# Supplementary material
Source: PubMed Central journal article supplement (PMC11195363)
Supplement: media-4.pdf [file media-4.pdf]

#### Additional file 4 – Structure predictions

PSIPRED secondary structure predictions for *Dspp* and *Aqp1*, including both extant species with unrooted molars and the hypothetical ancestral nodes where ancestral sequence reconstruction showed the amino acid at the site under positive selection had changed.

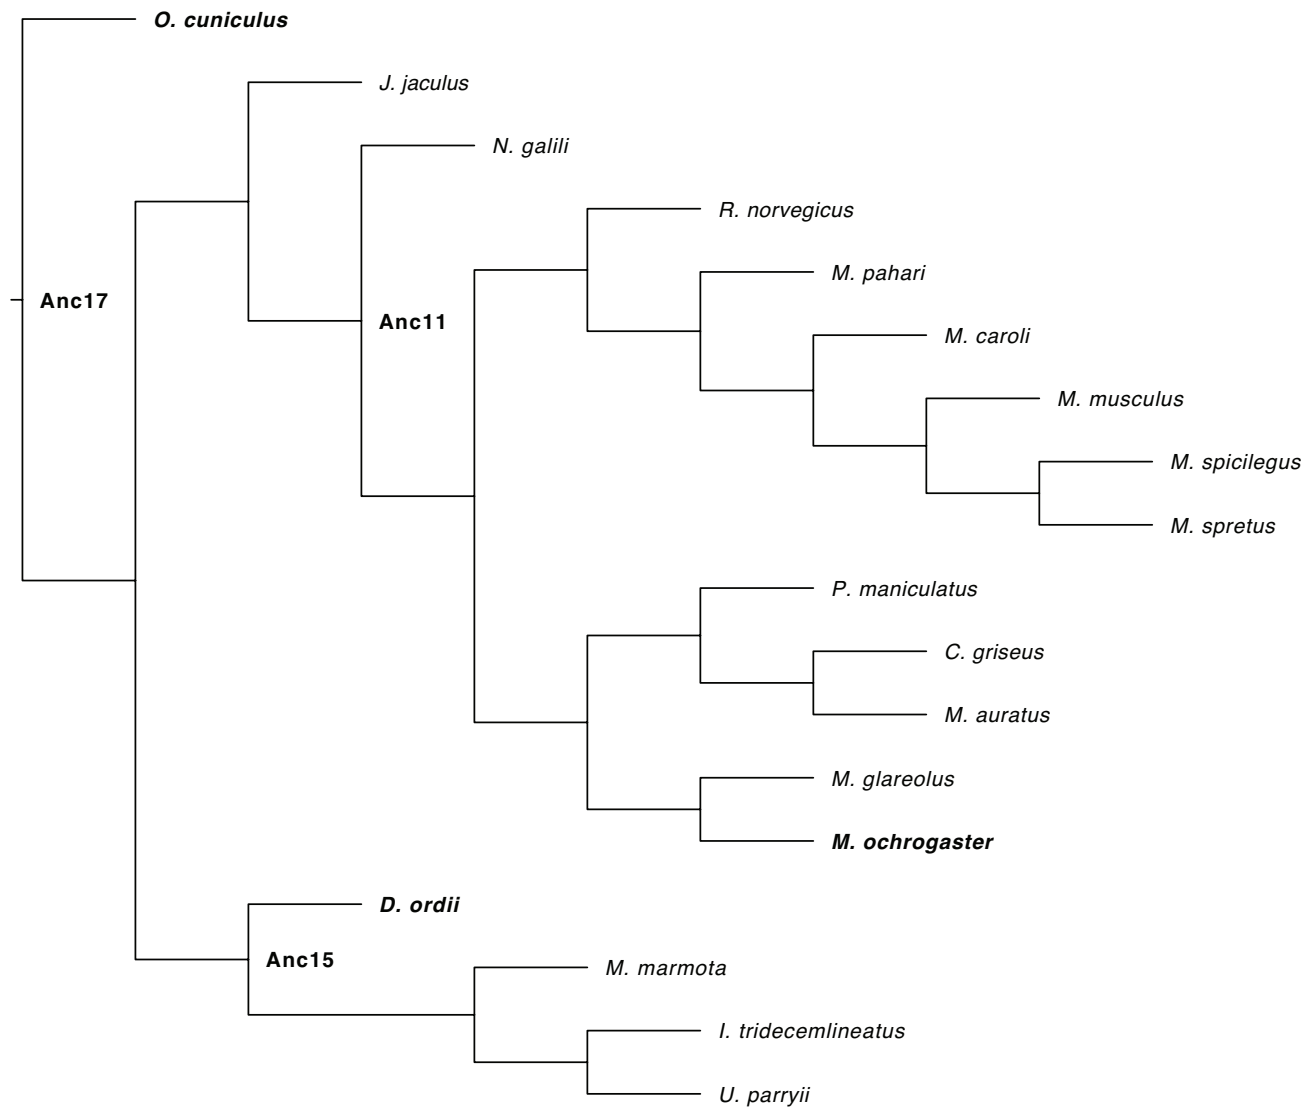

**Figure A4.1** – Gene tree for *Dspp* based on OrthoFinder analysis. Labeled internal nodes represent hypothetical ancestors where the amino acid at the site under branch-specific positive selection changed in the ancestral state reconstruction. Bold text indicates the internal nodes and tips for which we made secondary structure predictions.



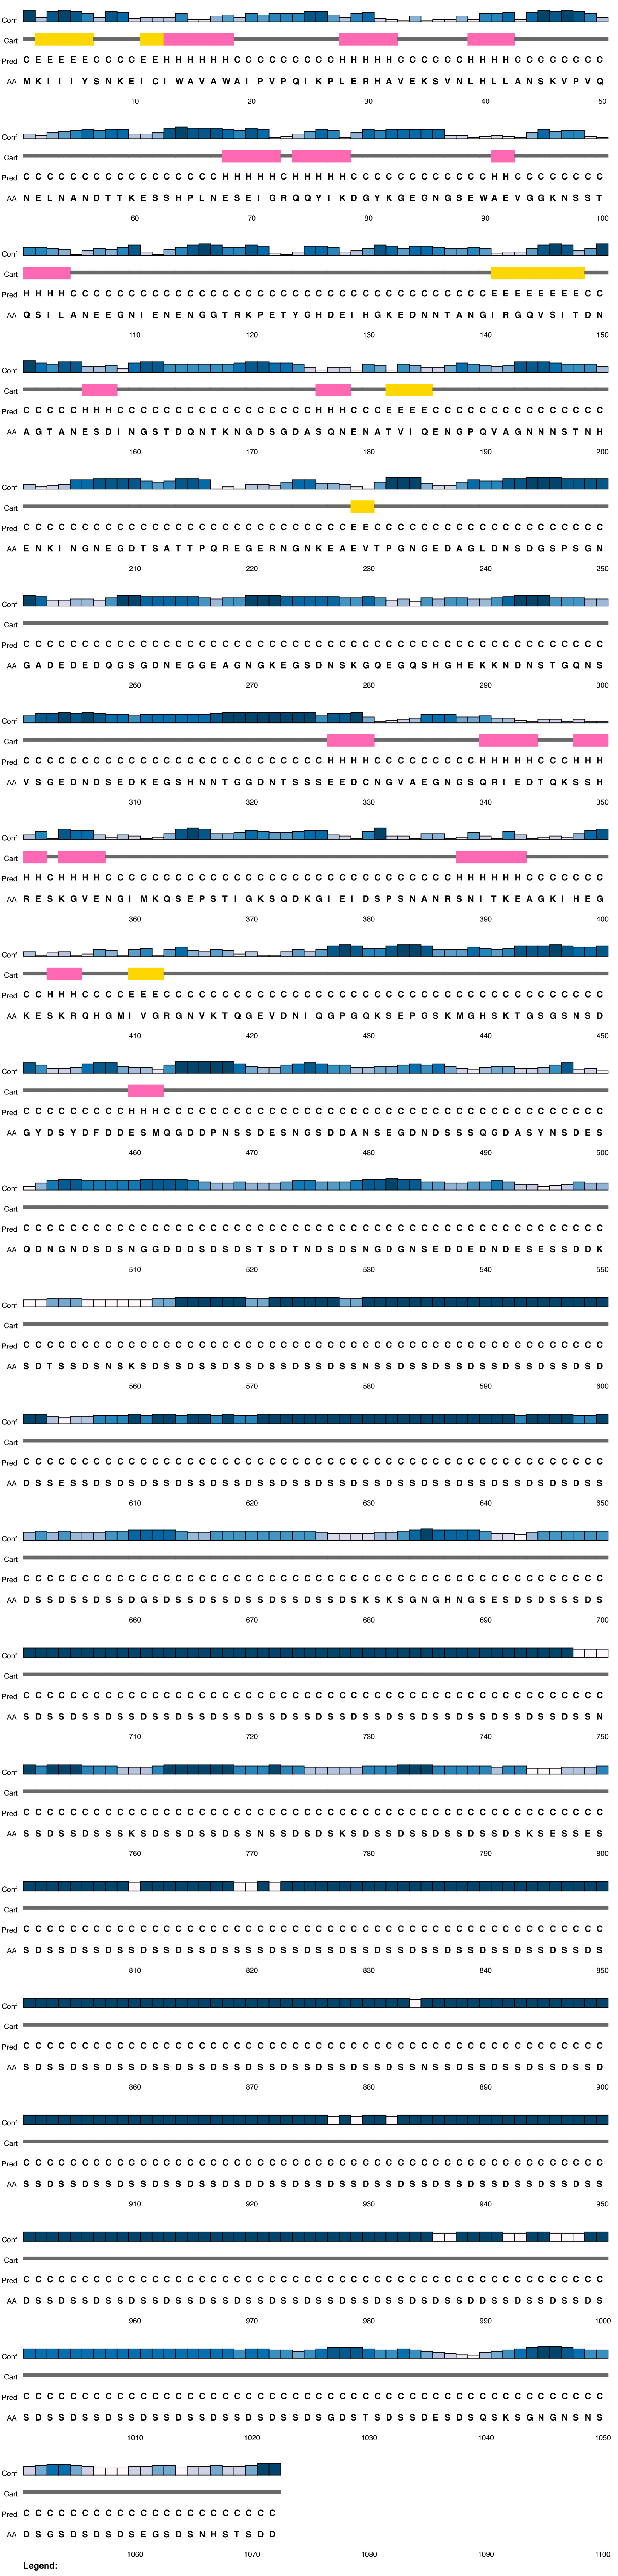

**Figure A4.3** – *Dspp* secondary structure prediction for Anc17, the ancestor of *Oryctolagus cuniculus*. Anc17 had an asparagine at the site under positive selection which was substituted for a leucine in *O. cuniculus* (see Figure 6 in the main text).





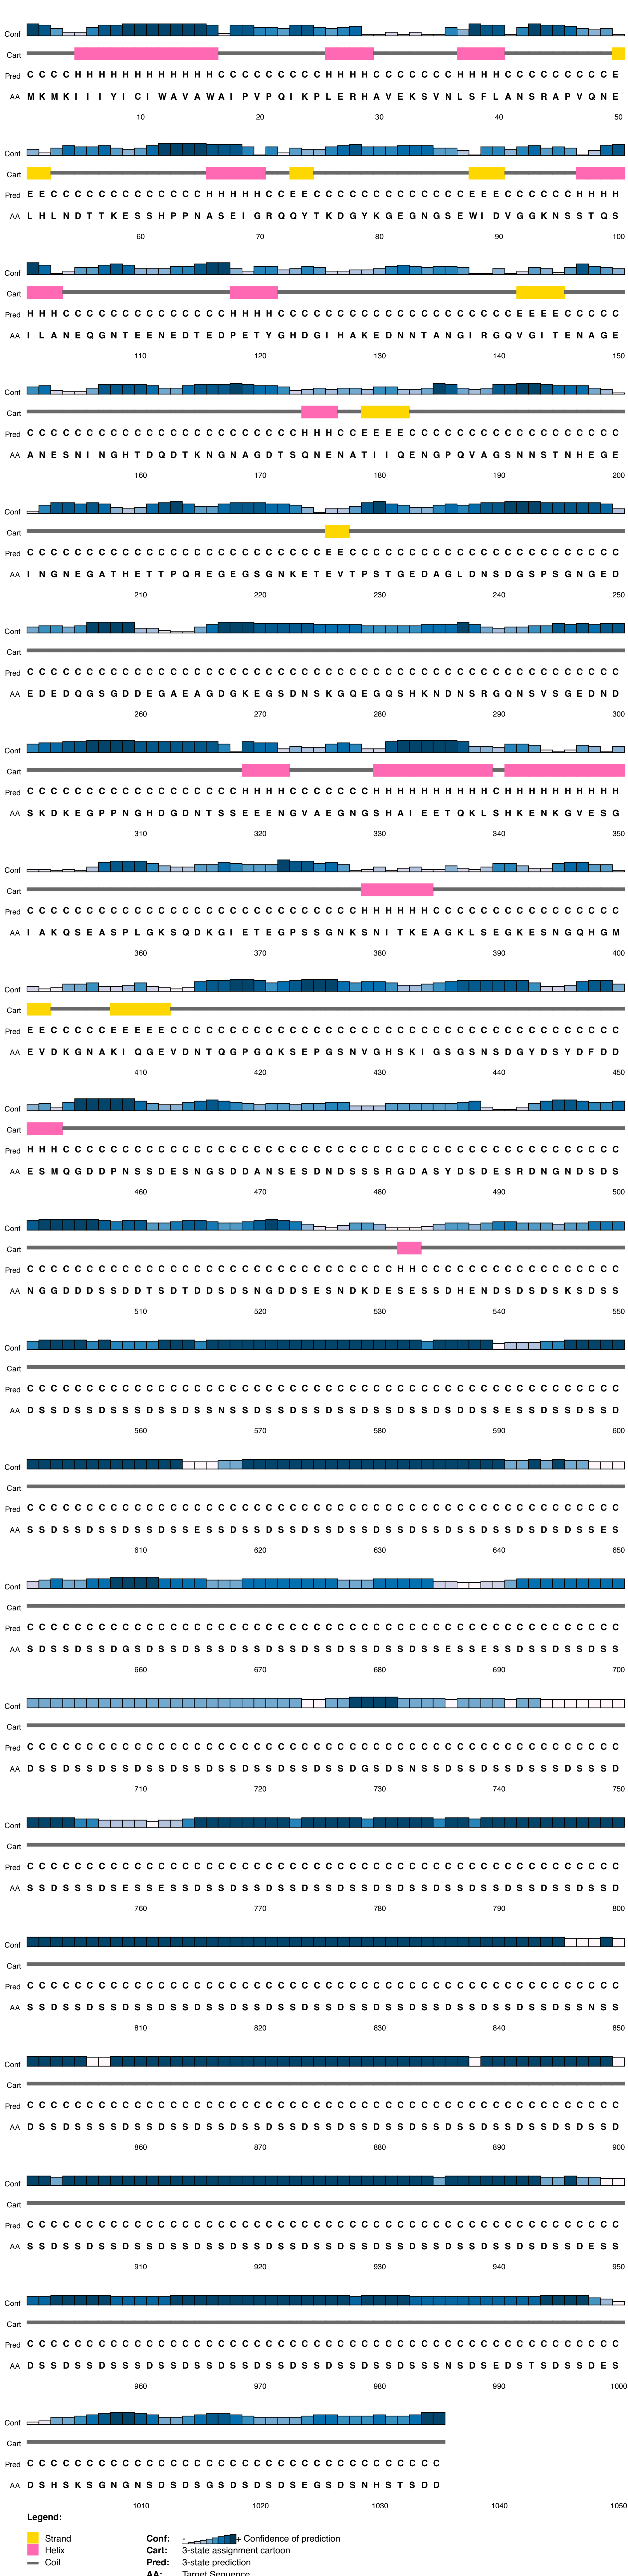

**Figure A4.5** – *Dspp* secondary structure prediction for Anc11, the ancestor of *Microtus ochrogaster*. Anc11 had an asparagine at the site under positive selection which was substituted for a histidine in *M. ochrogaster* (see Figure 6 in the main text).



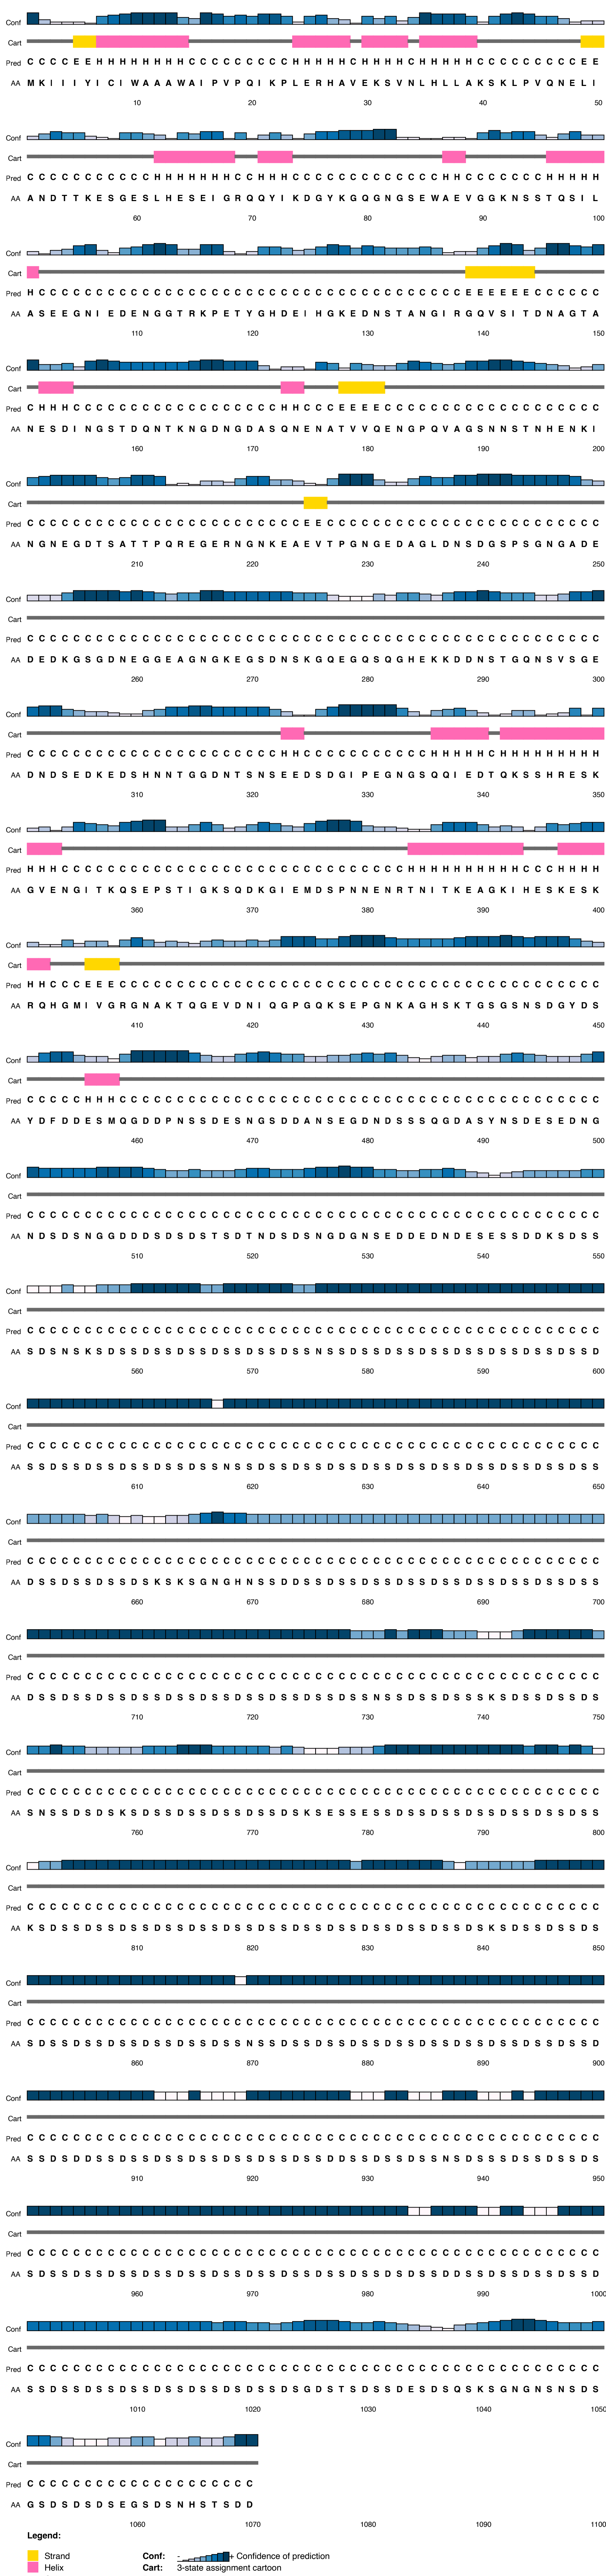

**Figure A4.7** – *Dspp* secondary structure prediction for Anc15, the ancestor of *Dipodomys ordii*. Anc15 had an asparagine at the site under positive selection which was substituted for an aspartic acid in *D. ordii* (see Figure 6 in the main text).

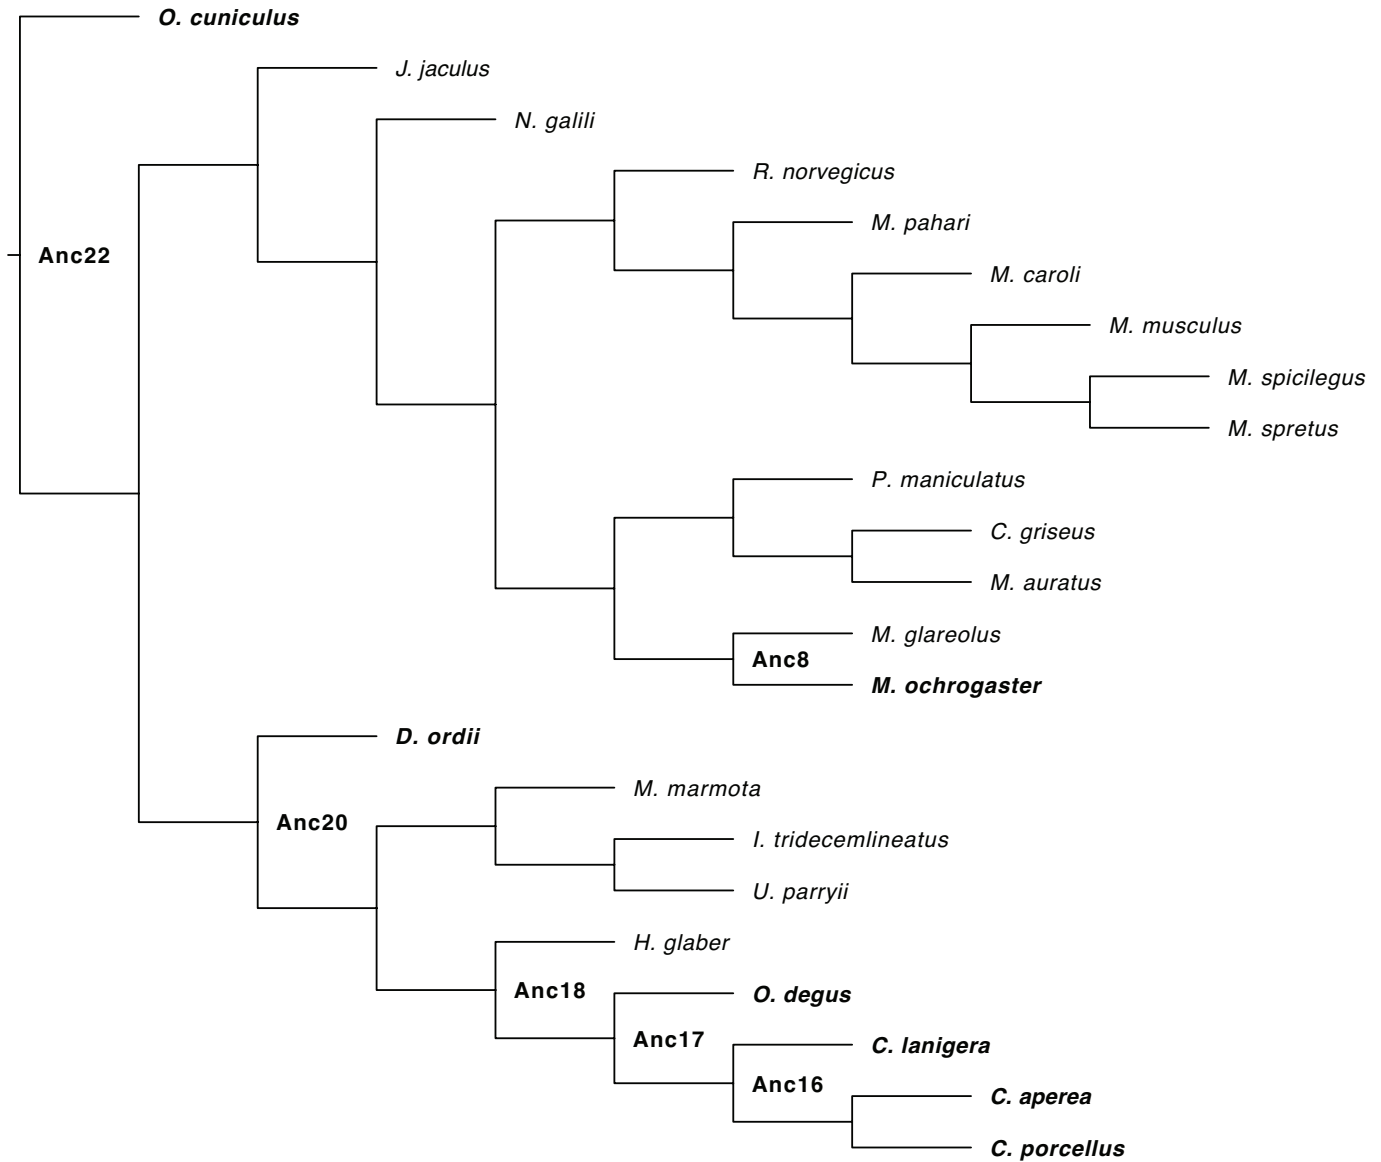

**Figure A4.8** – Gene tree for *Aqp1* based on OrthoFinder analysis. Labeled internal nodes represent hypothetical ancestors where the amino acid at the site under branch-specific positive selection changed in the ancestral state reconstruction. Bold text indicates the internal nodes and tips for which we made secondary structure predictions.



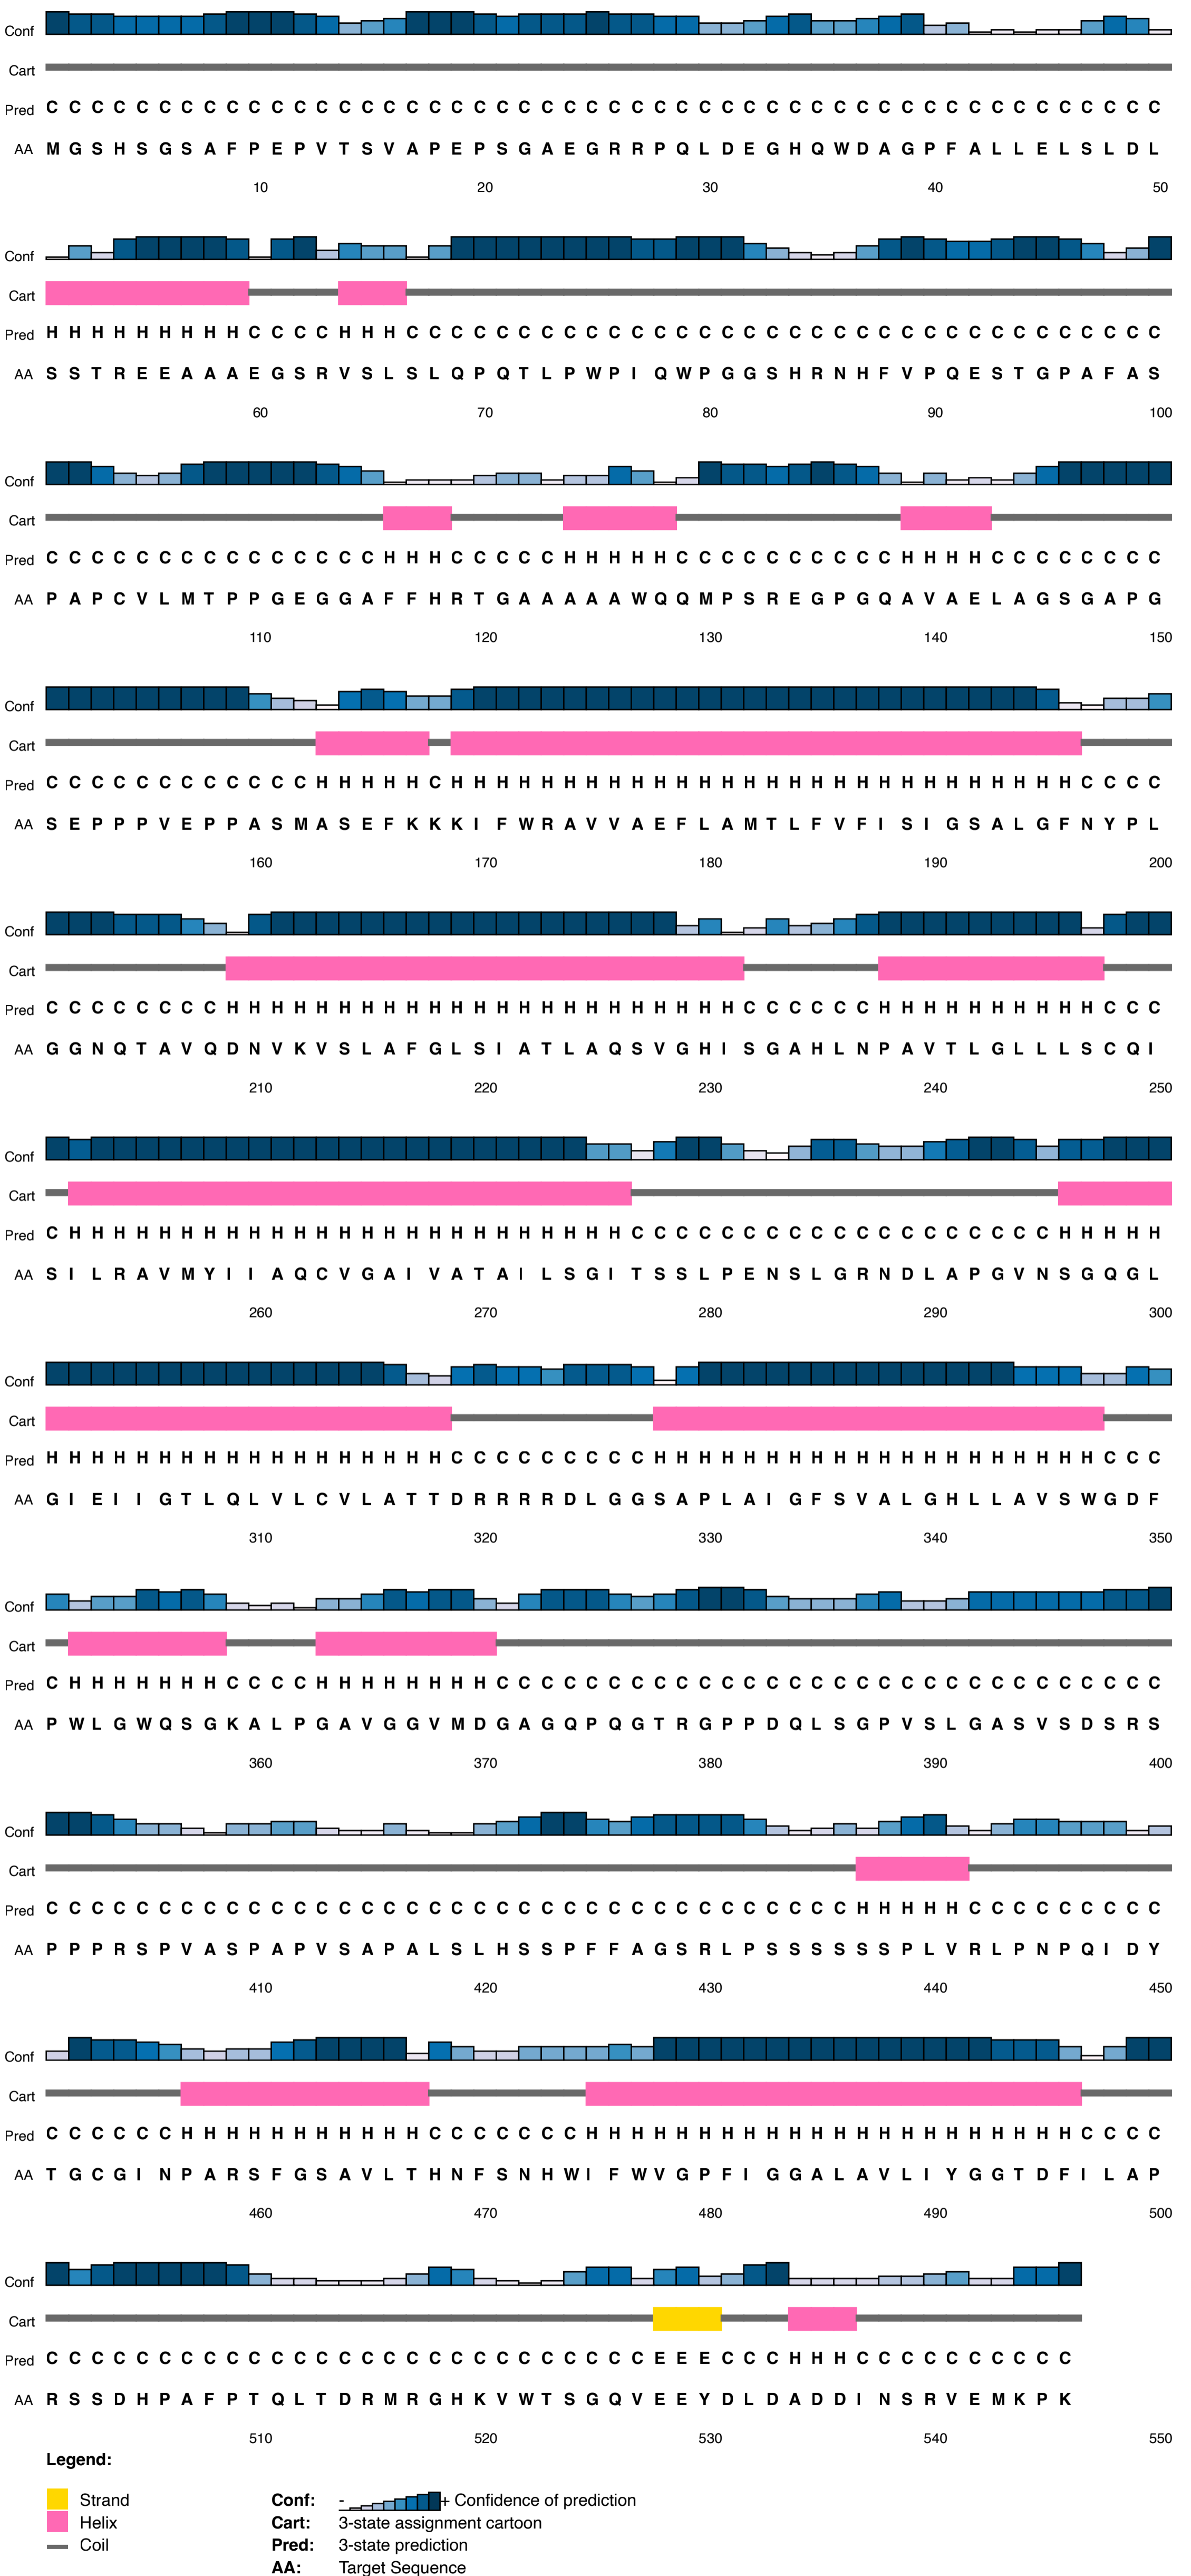

**Figure A4.10** – *Aqp1* secondary structure prediction for Anc 22. At the site under positive selection Anc 22 and its descendent *Oryctolagus cuniculus* both had a proline (see Figure 6 in the main text).









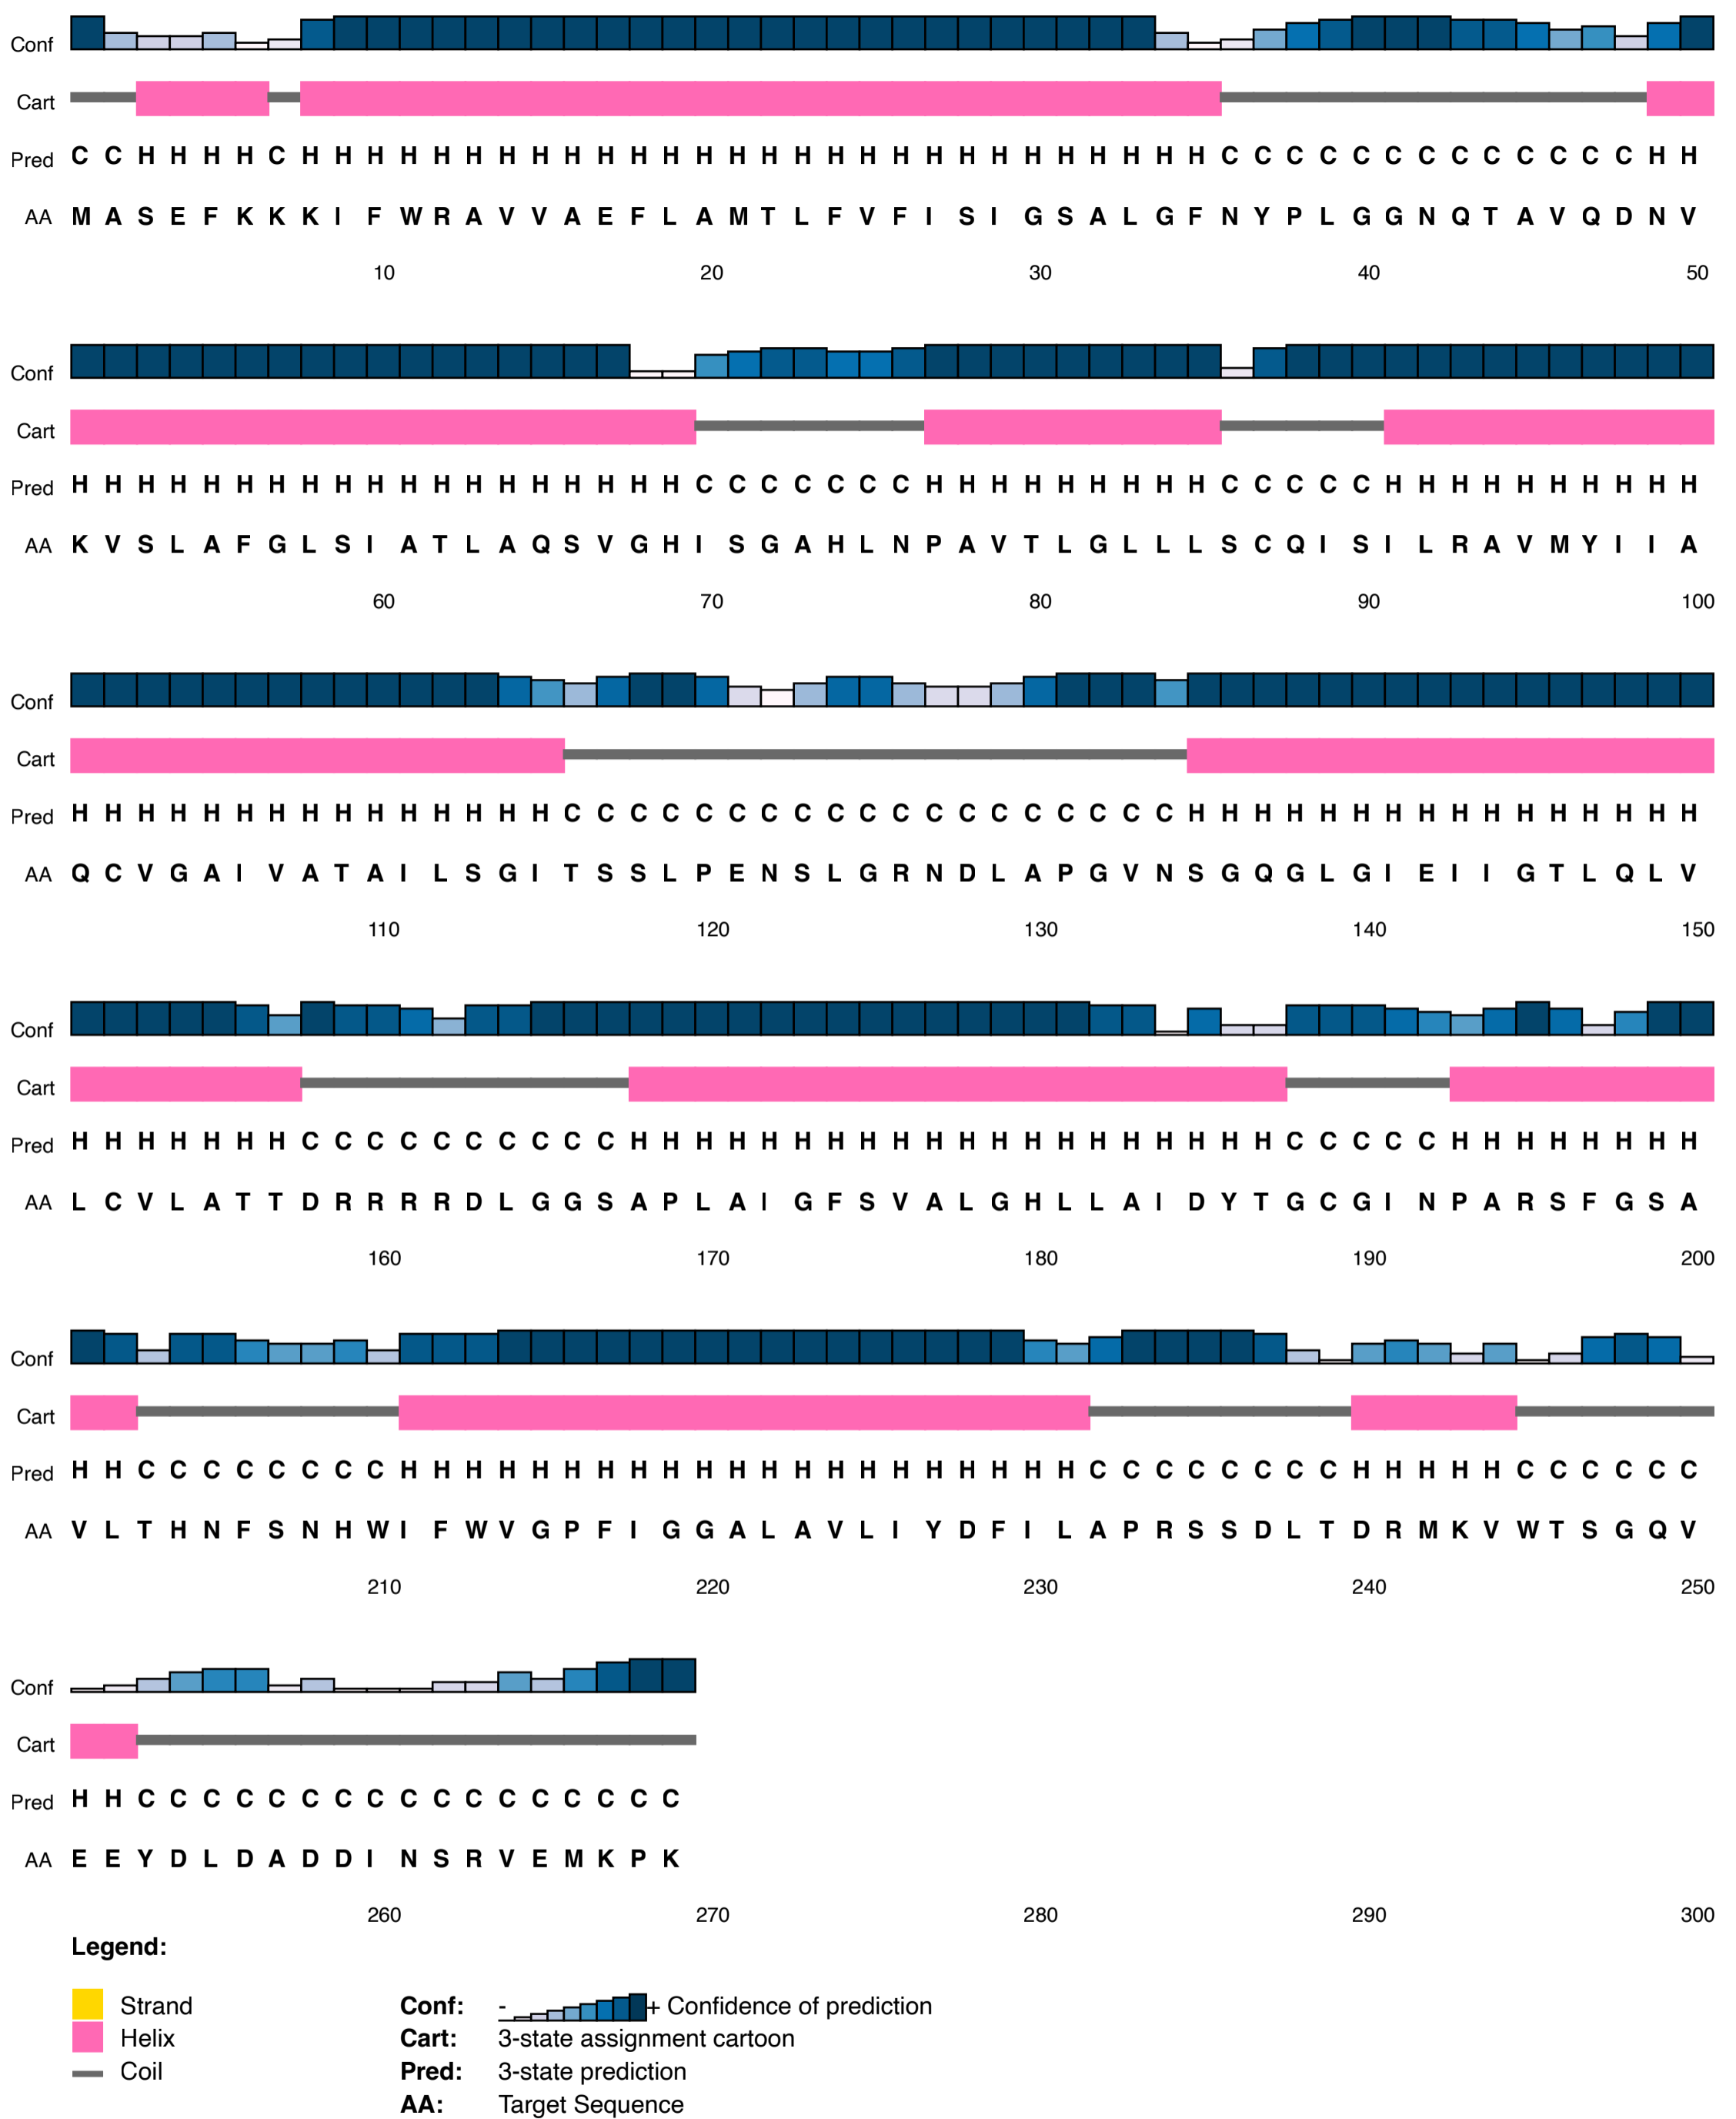

**Figure A4.14** – *Aqp1* secondary structure prediction for Anc20, the ancestor of *Dipodomys ordii*. Anc20 had a proline at the site under positive selection which was substituted for an serine in *D. ordii* (see Figure 6 in the main text).
