# Supplementary material
Source: PubMed Central journal article supplement (PMC11195363)
Supplement: media-6.pdf [file media-6.pdf]

## **Additional file 6 – Oligonucleotide primers**

Primer sequences used for qPCR analyses of expression in bank vole and prairie vole M1 at three embryonic days.

Bank vole (*Myodes glareolus*, rooted molars)

Aqp1\_forward: GGGCATTGAGATCATCGGCA

Aqp1\_reverse: CCAGTGTAGTCAATCGCCAG

Dspp\_forward: AGGAACTCCAGCACAGAATGA

Dspp\_reverse: TCGTCCCTCCTACGTCTGTT

GAPDH\_forward: GTGGGCAAAGTCATCCCAGA

GAPDH\_reverse: GTGTAGCCCTTGATGCCCTT

Prairie vole (*Microtus ochrogaster*, unrooted molars)

Aqp1\_forward: GCTCCTGCTCAGTTGTCAGAT

Aqp1\_reverse: CACACCTCGAGCCAGGTCATT

Dspp\_forward: GGA ACTCCAGCACAGGATGA

Dspp\_reverse: TCGTCCCTCCTACGTCTGTT

GAPDH\_forward: TGGAGACAGCCGCTTCTTTT

GAPDH\_reverse: GCGTCCAATACGGCCAAATC
